# Supplementary material for: Cognitive impairment is associated with greater preoperative symptoms, worse health-related quality of life, and reduced likelihood of recovery after cervical and lumbar spine surgery
Source: PubMed Central journal article supplement — N Am Spine Soc J. 2022 May 22;10:100128. doi: 10.1016/j.xnsj.2022.100128 (PMC9189192; doi:10.1016/j.xnsj.2022.100128), 2022-05-22
Supplement: mmc1.pdf [file mmc1.pdf]

|                            |                                 |                        |                                                       |
|----------------------------|---------------------------------|------------------------|-------------------------------------------------------|
| committee chair or higher) | Click or tap here to enter text | Click to select amount | <input type="checkbox"/> Paid directly to Institution |
|                            | Click or tap here to enter text | Click to select amount | <input type="checkbox"/> Paid directly to Institution |
|                            | Click or tap here to enter text | Click to select amount | <input type="checkbox"/> Paid directly to Institution |
|                            | Click or tap here to enter text | Click to select amount | <input type="checkbox"/> Paid directly to Institution |
|                            | Click or tap here to enter text | Click to select amount | <input type="checkbox"/> Paid directly to Institution |
|                            | Click or tap here to enter text | Click to select amount | <input type="checkbox"/> Paid directly to Institution |
|                            | Click or tap here to enter text | Click to select amount | <input type="checkbox"/> Paid directly to Institution |
|                            | Click or tap here to enter text | Click to select amount | <input type="checkbox"/> Paid directly to Institution |
|                            | Click or tap here to enter text | Click to select amount | <input type="checkbox"/> Paid directly to Institution |
|                            | Click or tap here to enter text | Click to select amount | <input type="checkbox"/> Paid directly to Institution |
|                            | Click or tap here to enter text | Click to select amount | <input type="checkbox"/> Paid directly to Institution |
|                            | Click or tap here to enter text | Click to select amount | <input type="checkbox"/> Paid directly to Institution |

**Please remember to SAVE this form before closing and submitting with your manuscript.**

**Thank you!**
