# Supplementary material for: Cognitive impairment is associated with greater preoperative symptoms, worse health-related quality of life, and reduced likelihood of recovery after cervical and lumbar spine surgery
Source: PubMed Central journal article supplement — N Am Spine Soc J. 2022 May 22;10:100128. doi: 10.1016/j.xnsj.2022.100128 (PMC9189192; doi:10.1016/j.xnsj.2022.100128), 2022-05-22
Supplement: mmc2.pdf [file mmc2.pdf]

|    |                                                                              |                                          |                        |                                                       |
|----|------------------------------------------------------------------------------|------------------------------------------|------------------------|-------------------------------------------------------|
| 14 | Other Office<br>(leadership<br>positions of<br>committee chair or<br>higher) | <input checked="" type="checkbox"/> None |                        |                                                       |
|    |                                                                              | Click or tap here to enter text          | Click to select amount | <input type="checkbox"/> Paid directly to Institution |
|    |                                                                              | Click or tap here to enter text          | Click to select amount | <input type="checkbox"/> Paid directly to Institution |
|    |                                                                              | Click or tap here to enter text          | Click to select amount | <input type="checkbox"/> Paid directly to Institution |
|    |                                                                              | Click or tap here to enter text          | Click to select amount | <input type="checkbox"/> Paid directly to Institution |
|    |                                                                              | Click or tap here to enter text          | Click to select amount | <input type="checkbox"/> Paid directly to Institution |
|    |                                                                              | Click or tap here to enter text          | Click to select amount | <input type="checkbox"/> Paid directly to Institution |
|    |                                                                              | Click or tap here to enter text          | Click to select amount | <input type="checkbox"/> Paid directly to Institution |
|    |                                                                              | Click or tap here to enter text          | Click to select amount | <input type="checkbox"/> Paid directly to Institution |
|    |                                                                              | Click or tap here to enter text          | Click to select amount | <input type="checkbox"/> Paid directly to Institution |
|    |                                                                              | Click or tap here to enter text          | Click to select amount | <input type="checkbox"/> Paid directly to Institution |
|    |                                                                              | Click or tap here to enter text          | Click to select amount | <input type="checkbox"/> Paid directly to Institution |
|    |                                                                              | Click or tap here to enter text          | Click to select amount | <input type="checkbox"/> Paid directly to Institution |
|    |                                                                              | Click or tap here to enter text          | Click to select amount | <input type="checkbox"/> Paid directly to Institution |

**Please remember to SAVE this form before closing and submitting with your manuscript.**

**Thank you!**
