# Supplementary material for: Cognitive impairment is associated with greater preoperative symptoms, worse health-related quality of life, and reduced likelihood of recovery after cervical and lumbar spine surgery
Source: PubMed Central journal article supplement — N Am Spine Soc J. 2022 May 22;10:100128. doi: 10.1016/j.xnsj.2022.100128 (PMC9189192; doi:10.1016/j.xnsj.2022.100128), 2022-05-22
Supplement: mmc4.pdf [file mmc4.pdf]

## FDA Approval Status of Devices/Drugs

Article Title:

Manuscript reference #:

### FDA Approval Status

If a device or drug requiring FDA approval is identified as an important component of your article, you must indicate the FDA status for use as it will be discussed. Please list the name of the device(s) and drug(s) requiring FDA approval and check the appropriate status for use as it is discussed in the article.

My manuscript does not discuss any drugs or devices requiring FDA approval.

1. Device/Drug

Not Applicable  Not approved for this indication  Approved  Investigational

2. Device/Drug

Not Applicable  Not approved for this indication  Approved  Investigational

3. Device/Drug

Not Applicable  Not approved for this indication  Approved  Investigational

4. Device/Drug

Not Applicable  Not approved for this indication  Approved  Investigational

5. Device/Drug

Not Applicable  Not approved for this indication  Approved  Investigational

Corresponding Author Name:

Date:
